# Supplementary material for: Differential plasticity of epiblast and primitive endoderm precursors within the ICM of the early mouse embryo
Source: Oxford University Press journal article supplement (doi:10.1242/dev.067702), 2011-11-17
Supplement: dev067702tables1.pdf [file dev067702tables1.pdf]

**Table S1. Numbers of chimaeras and total donor progeny for each donor group**

| Type of donor    | Total number of GFP-N donor progeny | Total number of GFP-H donor progeny | Total number of GFP-L donor progeny | Total number of donor progeny | Total number of chimaeras |
|------------------|-------------------------------------|-------------------------------------|-------------------------------------|-------------------------------|---------------------------|
| Early blastocyst | 105                                 | 76                                  | 88                                  | 269                           | 59                        |
| Mid blastocyst   | 80                                  | 65                                  | 121                                 | 266                           | 56                        |
| Late blastocyst  | 69                                  | 77                                  | 43                                  | 189                           | 36                        |
| E4.5 embryo      | 22                                  | 62                                  | 0                                   | 84                            | 20                        |
