# Supplementary figures and images for: Differential plasticity of epiblast and primitive endoderm precursors within the ICM of the early mouse embryo
Source: Oxford University Press journal article supplement (doi:10.1242/dev.067702), 2011-11-17

# A

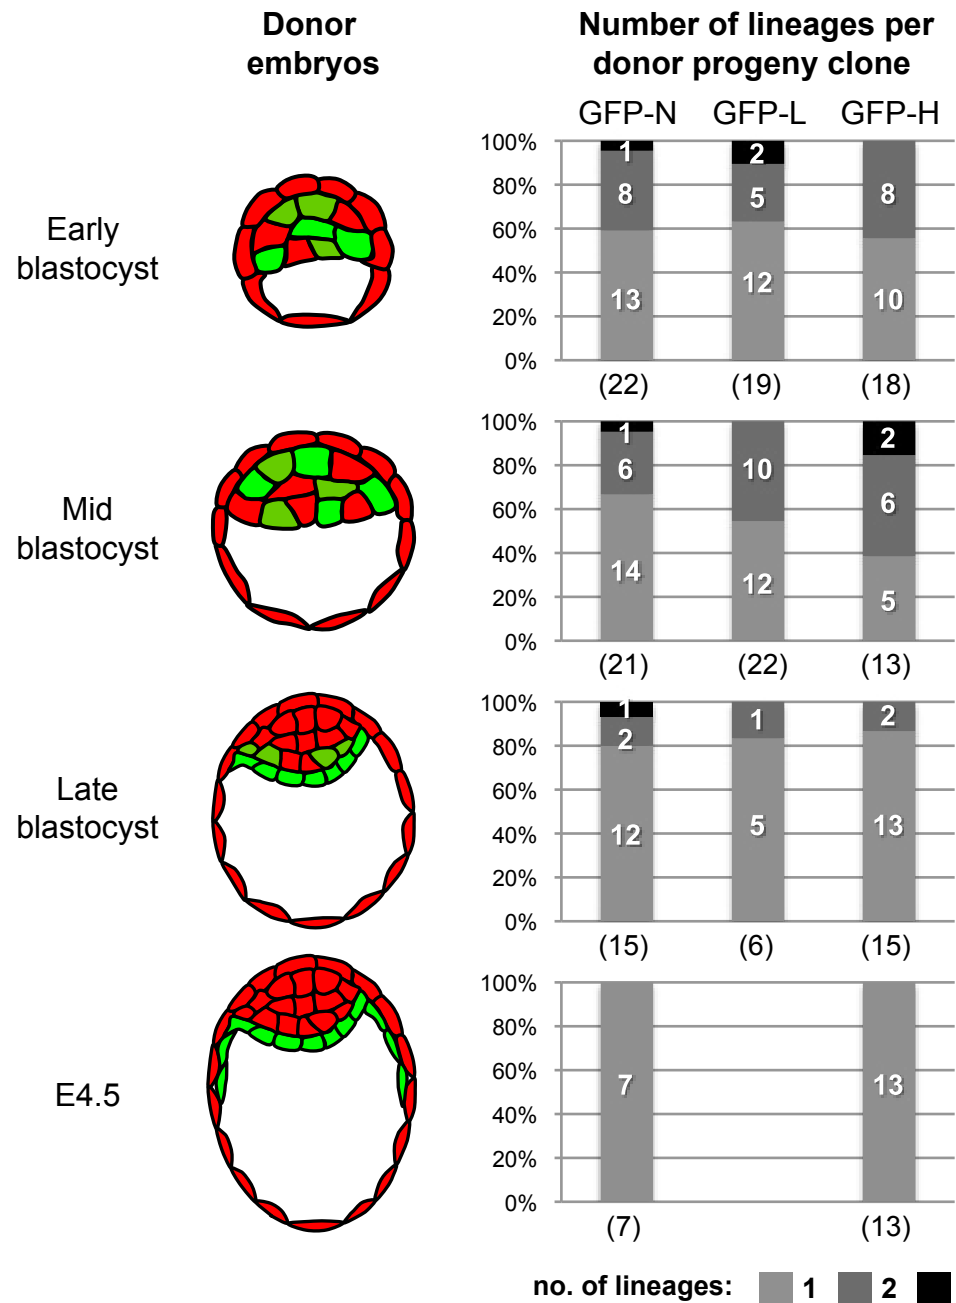

# B

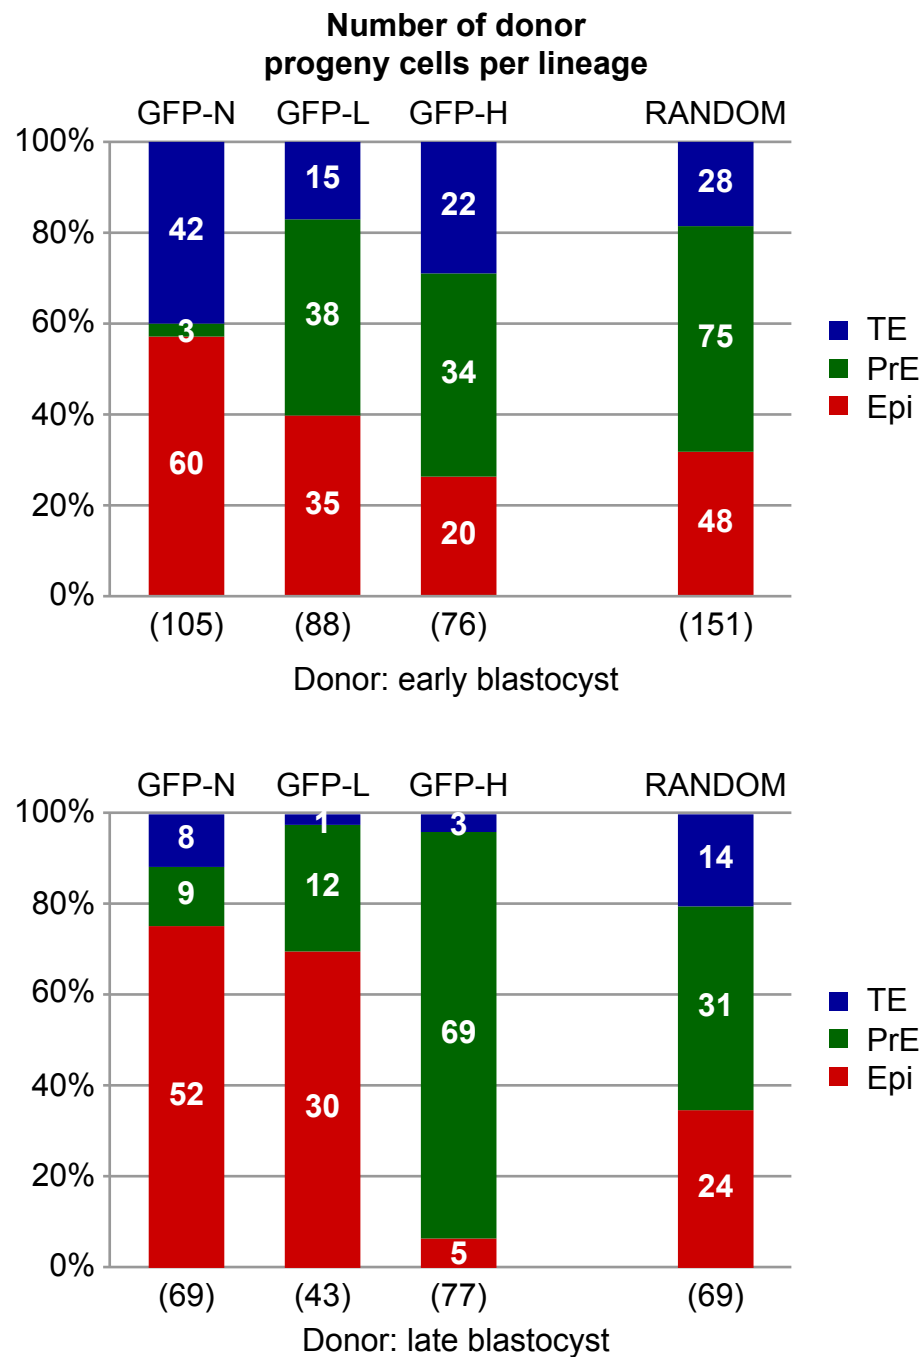

Supplement: dev067702figs1.pdf [file dev067702figs1.pdf]

**A**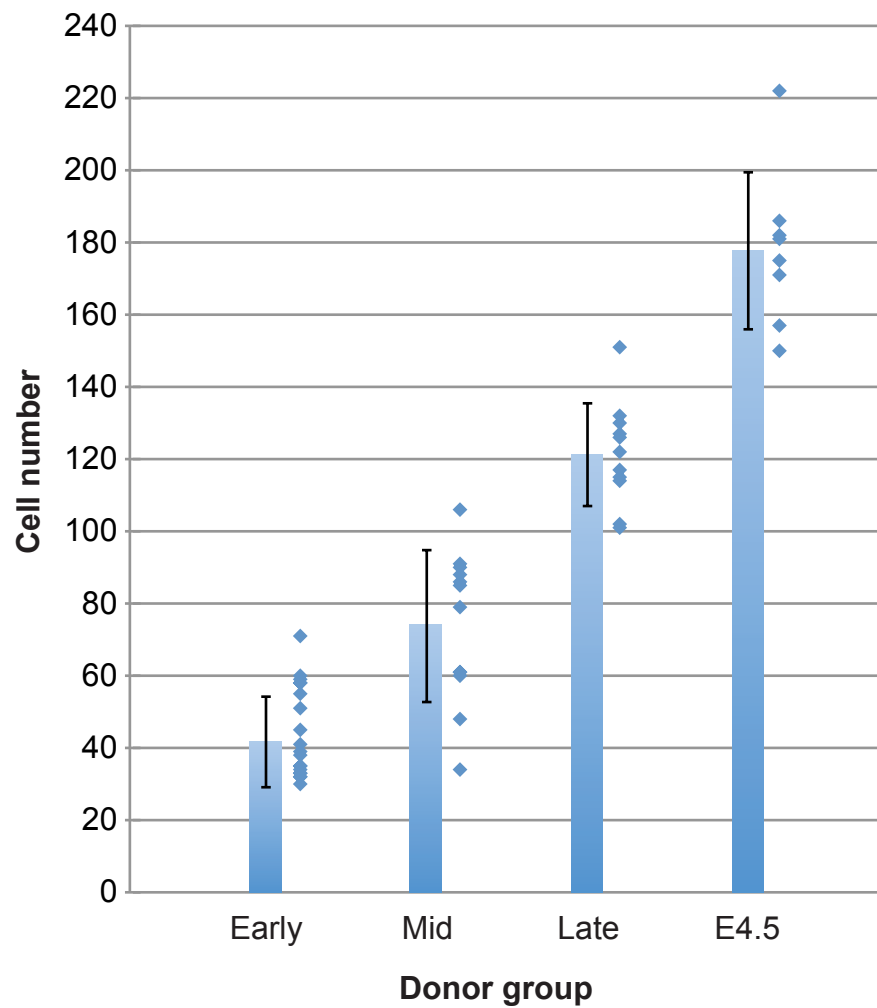**B**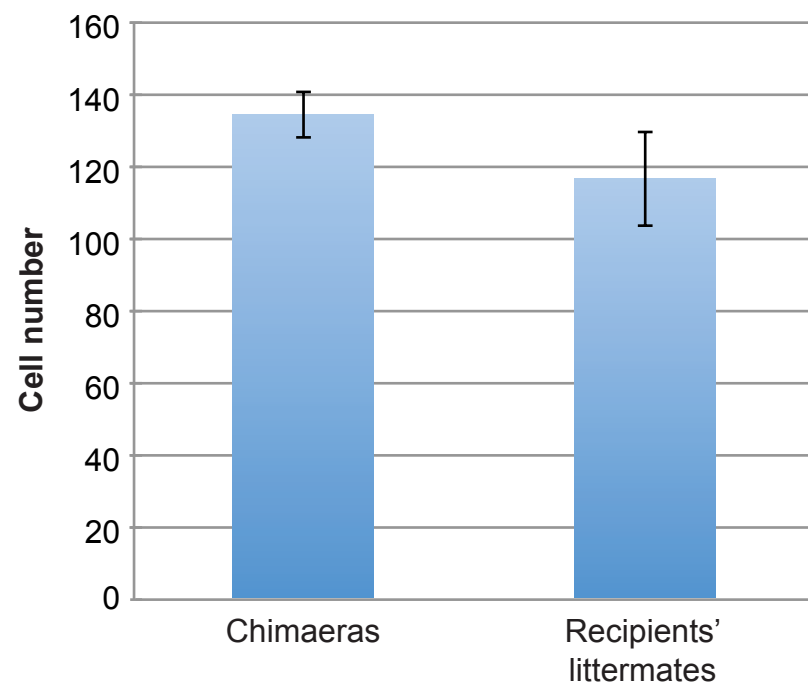**C**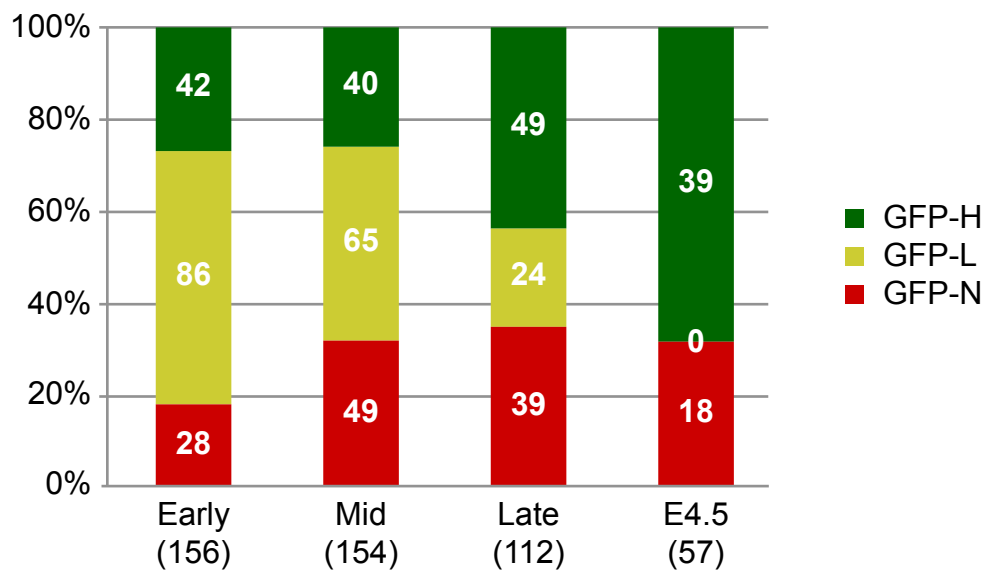

Supplement: dev067702figs2.pdf [file dev067702figs2.pdf]

**A****Mean clone size by donor cell type**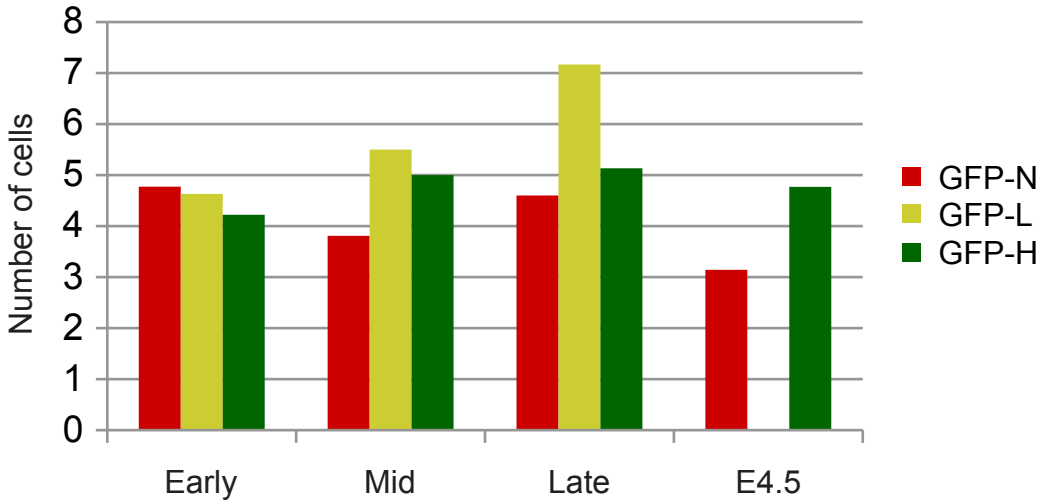**B****Mean clone size by lineage fate**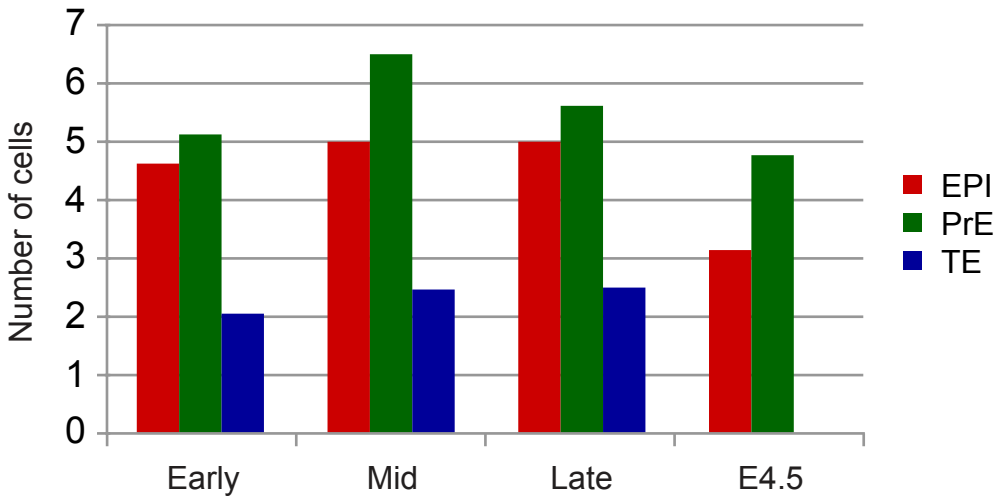

Supplement: dev067702figs4.pdf [file dev067702figs4.pdf]

Start point

12 hours

24 hours

36 hours

End point

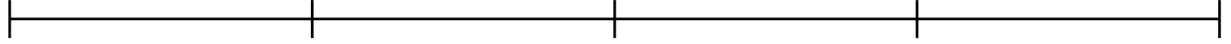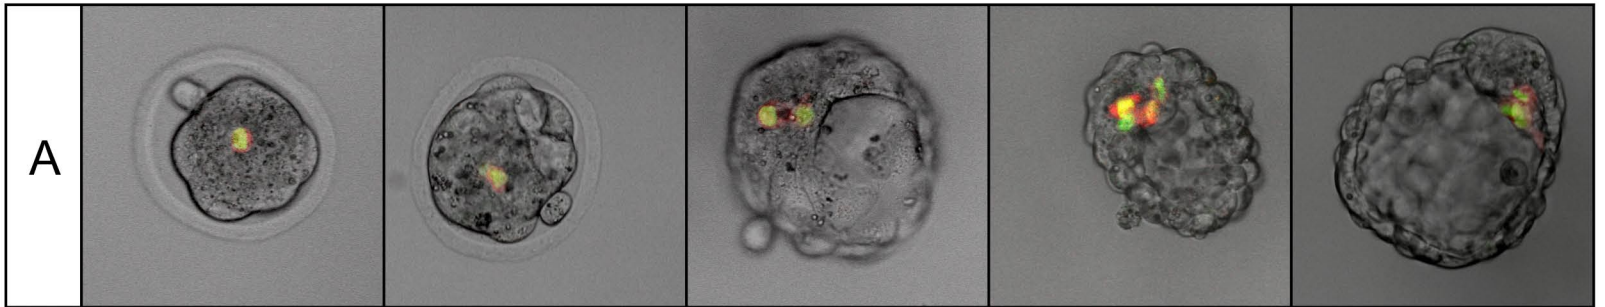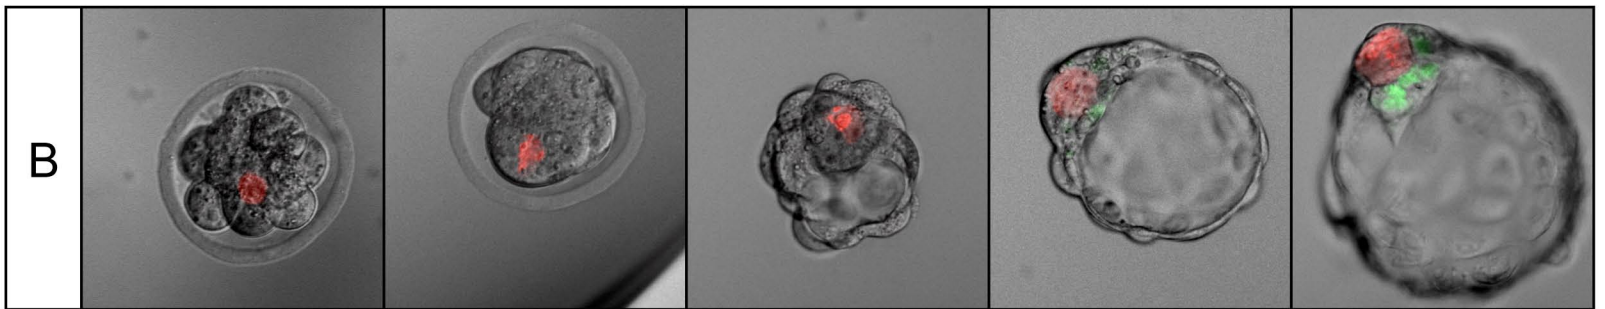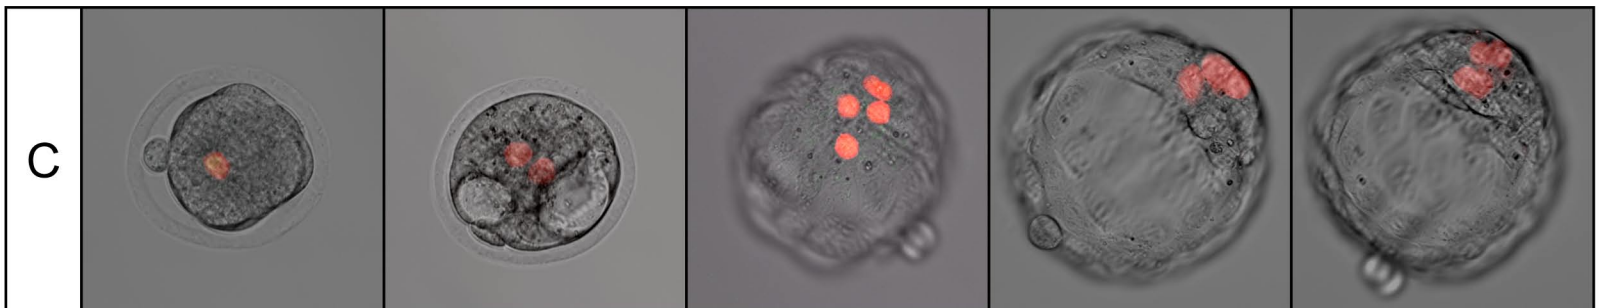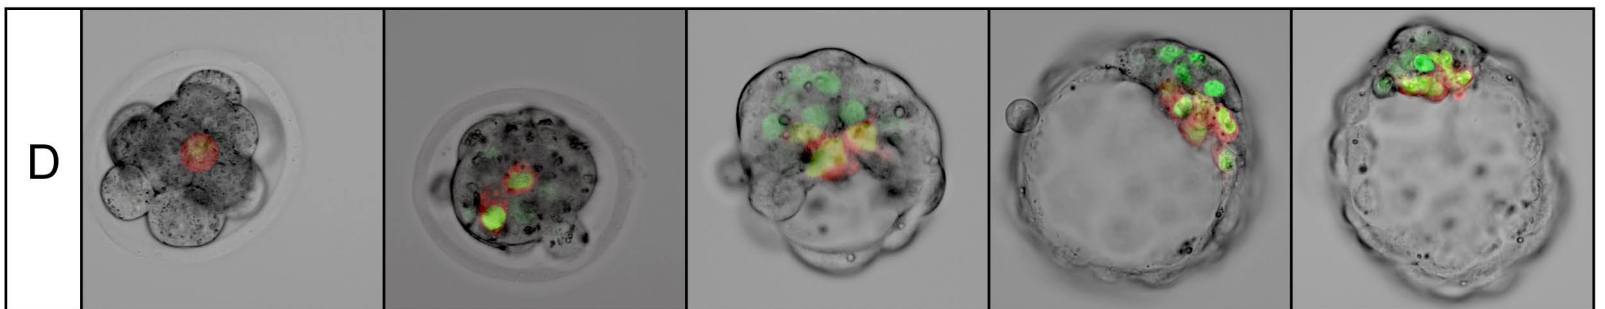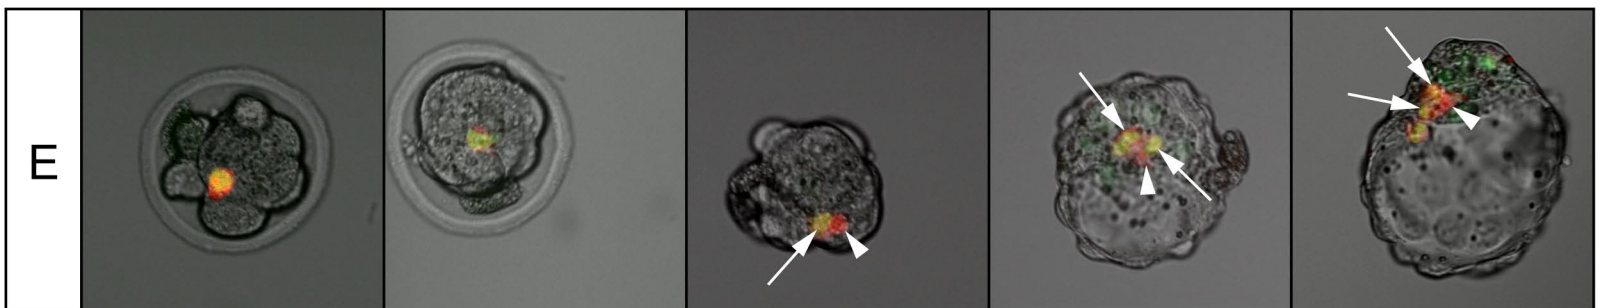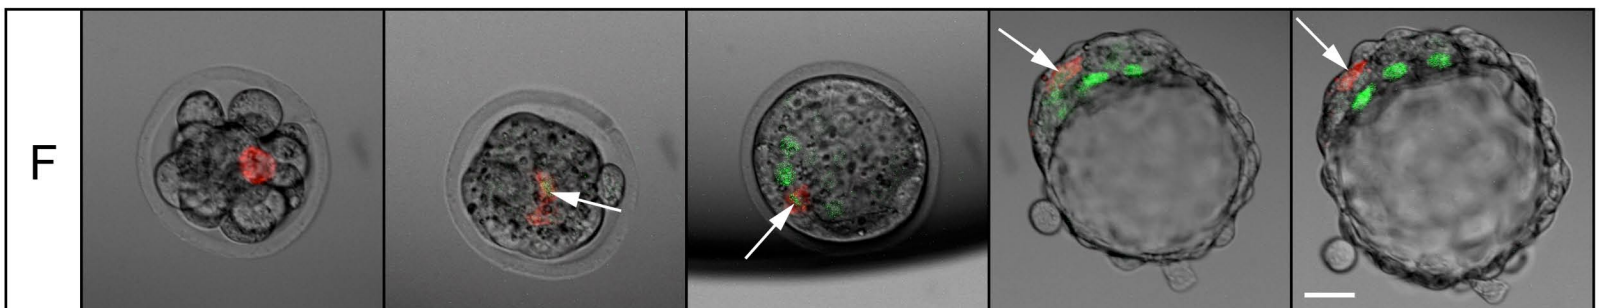

Supplement: dev067702figs5.pdf [file dev067702figs5.pdf]
